# Supplementary material for: Porphyrin-cobaloxime dyads for photoinduced hydrogen production: investigation of the primary photochemical process
Source: Royal Society of Chemistry journal article supplement (doi:10.1039/c3pp50184a), 2013-07-30
Supplement: c3pp50184a.pdf [file c3pp50184a.pdf]

## Electronic Supplementary Information

# Porphyrin-Cobaloxime Dyads for Photoinduced Hydrogen Production: Investigation of the Primary Photochemical Process

*Mirco Natali,<sup>\*a,b</sup> Michele Orlandi,<sup>a,b</sup> Claudio Chiorboli,<sup>c</sup> Elisabetta Iengo,<sup>\*d</sup> Valerio Bertolasi,<sup>a</sup>  
and Franco Scandola<sup>\*a,b</sup>*

(a) Dipartimento di Scienze Chimiche e Farmaceutiche, Università degli Studi di Ferrara, via  
Fossato di Mortara 17-19, 44121 Ferrara, Italy. E-mail: mirco.natali@unife.it, snf@unife.it.

(b) Centro Interuniversitario per la Conversione Chimica dell'Energia Solare, sezione di Ferrara, via  
L. Borsari 46, 44121 Ferrara, Italy.

(c) ISOF-CNR, sezione di Ferrara, via L. Borsari 46, 44121 Ferrara, Italy.

(d) Dipartimento di Scienze Chimiche e Farmaceutiche, Università degli Studi di Trieste, via L.  
Giorgeri 1, 34127 Trieste, Italy. E-mail: eiengo@units.it

## Table of Contents

|                                                                      |     |
|----------------------------------------------------------------------|-----|
| <b>Materials and Methods</b>                                         | S3  |
| <b>Synthesis</b>                                                     | S5  |
| <b>X-ray molecular structure of dyad 1 and crystallographic data</b> | S9  |
| <b>Additional Figures</b>                                            | S17 |
| <b>References</b>                                                    | S21 |

## Materials and Methods

**Materials.** Solvents for spectroscopic, photophysical and photolysis measurements were of spectroscopic grade, all the other reagents were of reagent grade quality, and used as received.

**NMR.**  $^1\text{H}$  spectra were recorded at 400 MHz on a *Bruker Avance 400 QNP* and at 500 MHz on a *Bruker Avance 500*. All spectra were run at room temperature (298 K) in pyridine- $d_5$ , acetonitrile- $d_3$ , dichloromethane- $d_2$  and chloroform- $d_1$ . Proton peak positions were referenced to the peak of residual non deuterated solvent.

**X-Ray crystallography.** Single crystal data of the complex **1** were collected on a *Nonius Kappa CCD* diffractometer using graphite monochromated Mo K $\alpha$  radiation ( $\lambda=0.7107\text{\AA}$ ) at 295 K. Data sets were integrated with the *Denzo SMN* package<sup>[S1]</sup> and corrected for Lorentz-polarization and absorption effects.<sup>[S2]</sup> The structure was solved by direct methods (SIR97)<sup>[S3]</sup> and refined by full-matrix least-squares methods with all non-hydrogen atoms anisotropic and hydrogens included on calculated positions, riding on their carrier atoms. The Cl atoms of the disordered molecule of  $\text{CHCl}_3$  were refined over two sites. To increase stability of refinement, a system of restraints to the  $\text{CHCl}_3$  geometry was employed.

Because of the presence of an ill-defined region of residual density, the refinement was far from satisfactory. For this reason the program *SQUEEZE* was used to cancel out the effects of the disordered solvent. *SQUEEZE* is part of the *PLATON* program system<sup>[S4]</sup> and attempts to remove mathematically the effects of disordered solvent.

All calculations were performed using *SHELXL-97*<sup>[S5]</sup> implemented in the *WINGX* system of programs<sup>[S6]</sup>.

**Electrochemical Measurements.** Cyclic Voltammetry (CV) measurements were carried out with a PC-interfaced *Eco Chemie Autolab/Pgstat 30* Potentiostat. Argon-purged  $10^{-4}$  M sample solutions in THF, containing 0.1 M (TBA)PF $_6$  (Fluka, electrochemical grade, 99%; dried in an

oven), were used. A conventional three-electrode cell assembly was adopted: a saturated calomel electrode (*SCE Amel*) and a platinum electrode, both separated from the test solution by a frit, were used as reference and counter electrodes, respectively; a glassy carbon electrode was used as the working electrode.

**Steady-state Absorption/Emission Measurements.** UV-Vis absorption spectra were recorded on a *Jasco V-570 UV/Vis/NIR* spectrophotometer. Emission spectra were taken on a *Horiba-Jobin Yvon Fluoromax-2* spectrofluorimeter, equipped with a *Hamamatsu R3896* tube.

**Time-Correlated Single Photon Counting (TCSPC).** Fluorescence lifetimes were measured using a TCSPC apparatus (*PicoQuant Picoharp 300*) equipped with subnanosecond LED sources (280, 380, 460, and 600 nm, 500-700 ps pulsewidth) powered by a *PicoQuant PDL 800-B* variable (2.5-40 MHz) pulsed power supply. The decays were analyzed by means of *PicoQuant FluoFit* Global Fluorescence Decay Analysis Software.

**Ultrafast Spectroscopy (UFS).** Femtosecond time-resolved experiments were performed using a pump-probe setup based on the *Spectra-Physics Hurricane* Ti:sapphire laser source and the Ultrafast Systems Helios spectrometer.<sup>[S7]</sup> The 530 and 550-nm pump pulses were generated with a *Spectra Physics 800 OPA*. Probe pulses were obtained by continuum generation on a sapphire plate (useful spectral range: 450-800 nm). Effective time resolution *ca.* 300 fs, temporal chirp over the white-light 450-750 nm range *ca.* 200 fs, temporal window of the optical delay stage 0-2000 ps. The time-resolved spectral data were analyzed with the *Ultrafast Systems Surface Explorer Pro* software.

## Synthesis

### Molecular precursors

**5-(4'-pyridyl)-10,15,20-triphenylporphyrin.** 5-(4'-pyridyl)-10,15,20-triphenylporphyrin was synthesized and purified according to literature methods.<sup>[S8]</sup>

**[5-(4'-pyridyl)-10,15,20-triphenylporphyrinato] zinc(II).** A concentrated CH<sub>2</sub>Cl<sub>2</sub> solution of 5-(4'-pyridyl)-10,15,20-triphenylporphyrin was treated overnight with an 8-fold molar excess of Zn(CH<sub>3</sub>COO)<sub>2</sub> dissolved in the minimum amount of MeOH. The solution was dried in vacuo and the obtained solid dissolved in CH<sub>2</sub>Cl<sub>2</sub>. The product was precipitated by addition of *n*-hexane, removed by filtration, washed thoroughly with cold methanol and diethyl ether and vacuumdried (Yield > 85%). <sup>1</sup>H NMR (CDCl<sub>3</sub>), δ<sub>H</sub>: 8.90 (2H, d, β<sub>4</sub>), 8.85 (2H, d, β<sub>3</sub>), 8.55 (2H, d, β<sub>2</sub>), 8.20 (2H, d, oH'), 8.10 (4H, d, oH), 7.75 (3H, m, mH'+pH'), 7.68 (6H, m, mH+pH), 7.45 (2H, d, β<sub>1</sub>), 6.25 (2H, br s, py<sub>Hb</sub>), 3.45 (2H, br s, py<sub>Ha</sub>).

### [5-(4'-pyridyl)-10,15,20-(3,5-di-*tert*-butyl)-triphenylporphyrinato-hydroxo]

**aluminum(III).**<sup>[S9]</sup> 300 mg (2.82 mmol) of 5-(4'-pyridyl)-10,15,20-(3,5-di-*tert*-butyl)-triphenylporphyrin were dissolved in 100 ml of dry toluene and 0.2 ml of trimethylaluminium (2.0 M in toluene, 5.6 mmol) were added under N<sub>2</sub> atmosphere. The solution was stirred at room T, under N<sub>2</sub> atmosphere, for 4 hr, at which time 5 ml of H<sub>2</sub>O were added and stirring was continued overnight. The toluene was removed and the violet solid thus formed was redissolved in CH<sub>2</sub>Cl<sub>2</sub>. The solution was filtered dried over Na<sub>2</sub>SO<sub>4</sub> and passed over a column of alumina to give 265 mg of product (85%). <sup>1</sup>H NMR (pyridine-*d*<sub>5</sub>), δ<sub>H</sub>: 9.28 (6H, m, β<sub>4</sub>+β<sub>3</sub>+β<sub>2</sub>), 9.12 (4H, m, β<sub>1</sub>+py<sub>Ha</sub>), 8.2 (6H, br d, oH+oH'), 8.15 (2H, d, py<sub>Hb</sub>), 7.84 (3H, d, br, pH+pH'), 1.54 (s, *t*Bu), 1.52 (s, *t*Bu).

**Chloro(acquo)bis(dimethylglyoximate) cobalt(III).** Co(dmGH)<sub>2</sub>Cl(H<sub>2</sub>O) was synthesized according to literature procedures.<sup>[S10]</sup> 1.10 g of CoCl<sub>2</sub>·6H<sub>2</sub>O (5 mmol) and 1.18 g of dmGH<sub>2</sub> (dimethylglyoxime, 11 mmol) were dissolved in 50 ml of 95% ethanol, and heated at 70°C. 5 ml of

a 1 M NaOH solution (5 mmol) were then added to the whole mixture and the solution was stirred for 1 hr at 70°C. After cooling at room temperature, a stream of air was blown through the solution for 30 min. The solution was filtered to remove side-reaction products and concentrated under vacuum to allow precipitation. The so obtained brown solid was collected by filtration on a Büchner funnel and washed with 5 ml water and then with 10 ml diethyl ether. The solid was then dried at room temperature to yield 590 mg of product (35%).  $^1\text{H}$  NMR (acetonitrile- $d_3$ ),  $\delta_{\text{H}}$ : 18.40 (2H, br s, OHO), 2.45 (12H, s,  $\text{CH}_3$ ).

### Molecular dyads 1-3

#### {5-(4'-pyridyl)-10,15,20-triphenylporphyrin}chloro bis(dimethylglyoximate) cobalt(III) (1).

49.2 mg (0.08 mmol) of 5-(4'-pyridyl)-10,15,20-triphenylporphyrin were dissolved in 400 ml of a 1/5  $\text{CH}_3\text{CN}/\text{CH}_2\text{Cl}_2$  mixture and 101.2 mg (0.32 mmol) of  $\text{Co}(\text{dmgH})_2\text{Cl}(\text{H}_2\text{O})$  were added to the solution under continuous stirring. The reaction mixture was left stirring for 1 hr at room temperature, and then concentrated to allow precipitation; the violet solid was collected by filtration on a Büchner funnel and washed with 10 ml diethyl ether to yield 55.2 mg of **1** (73%).  $^1\text{H}$  NMR ( $\text{CD}_2\text{Cl}_2$ ),  $\delta_{\text{H}}$ : 18.65 (2H, br s, OHO), 8.93 (6H, m,  $\text{py}_{\text{Ha}} + \beta_3 + \beta_4$ ), 8.70 (2H, d,  $\beta_2$ ), 8.66 (2H, d,  $\beta_1$ ), 8.24 (6H, m,  $\text{oH} + \text{oH}'$ ), 8.16 (2H, d,  $\text{py}_{\text{Hb}}$ ), 7.84 (9H, m,  $\text{mH} + \text{mH}' / \text{pH} + \text{pH}'$ ), 2.60 (12H, s,  $\text{CH}_3$ ), -2.85 (2H, s, NH).

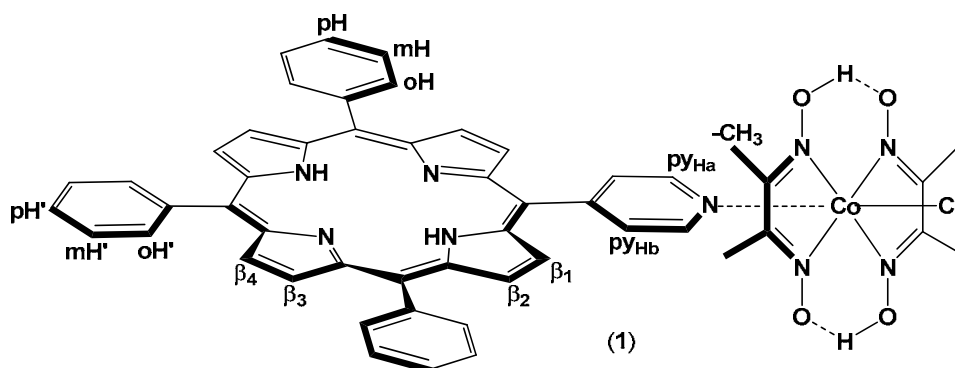

**{[5-(4'-pyridyl)-10,15,20-triphenylporphyrinato] zinc(II)} chloro bis(dimethylglyoximate) cobalt(III) (2).** 22.3 mg (0.03 mmol) of [5-(4'-pyridyl)-10,15,20-triphenylporphyrinato] zinc(II) were dissolved in 190 ml 1/5 CH<sub>3</sub>CN/CH<sub>2</sub>Cl<sub>2</sub> mixture and 41.5 mg (0.12 mmol) of Co(dm<sub>2</sub>H)<sub>2</sub>Cl(H<sub>2</sub>O) were added to the solution under continuous stirring. The reaction mixture was left stirring for 1 hr at room temperature, and then concentrated to allow precipitation. The violet solid was collected by filtration on a Büchner funnel and washed with 10 ml diethyl ether to yield 23.4 mg of **2** (71%). <sup>1</sup>H NMR (CD<sub>2</sub>Cl<sub>2</sub>), δ<sub>H</sub>: 18.65 (2H, br s, OHO), 9.00 (6H, m, β<sub>2</sub>+ β<sub>3</sub>+ β<sub>4</sub>), 8.78 (2H, d, β<sub>1</sub>), 8.63 (2H, d, py<sub>Ha</sub>), 8.23 (6H, m, oH+oH'), 8.16 (2H, d, py<sub>Hb</sub>), 7.82 (9H, m, mH+mH'/pH+pH'), 2.60 (12H, s, CH<sub>3</sub>).

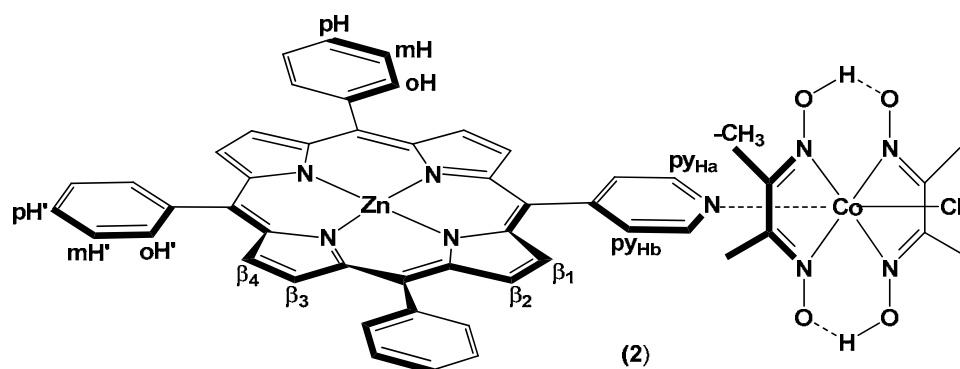

**{[5-(4'-pyridyl)-10,15,20-(3,5-di-*tert*-butyl)-triphenylporphyrinato-hydroxo] aluminum(III)}chloro bis(dimethylglyoximate) cobalt(III) (3).** 30 mg (0.03 mmol) of [5-(4'-pyridyl)-10,15,20-(3,5-di-*tert*-butyl)-triphenylporphyrinato-hydroxo] aluminum(III) were dissolved in 190 ml 1/5 CH<sub>3</sub>CN/CH<sub>2</sub>Cl<sub>2</sub> mixture and 41.1 mg (0.12 mmol) of Co(dm<sub>2</sub>H)<sub>2</sub>Cl(H<sub>2</sub>O) were added to the solution under continuous stirring. The reaction mixture was left stirring for 1 hr at room temperature, and was then concentrated to allow precipitation. The violet solid was collected by filtration on a Büchner funnel and washed with 10 ml diethyl ether to yield 21.7 mg of **3** (55%). <sup>1</sup>H NMR (CD<sub>2</sub>Cl<sub>2</sub>), δ<sub>H</sub>: 18.4 (2H, br s, OHO), 9.00 (8H, m, β<sub>2</sub>+ β<sub>3</sub>+ β<sub>4</sub>+ py<sub>Ha</sub>), 8.69 (2H, d, β<sub>1</sub>), 8.10 (8H, m, oH+oH'+py<sub>Hb</sub>), 7.78 (3H, m, pH+pH'), 2.45 (12H, s, CH<sub>3</sub>), 1.65 (m, *t*Bu).

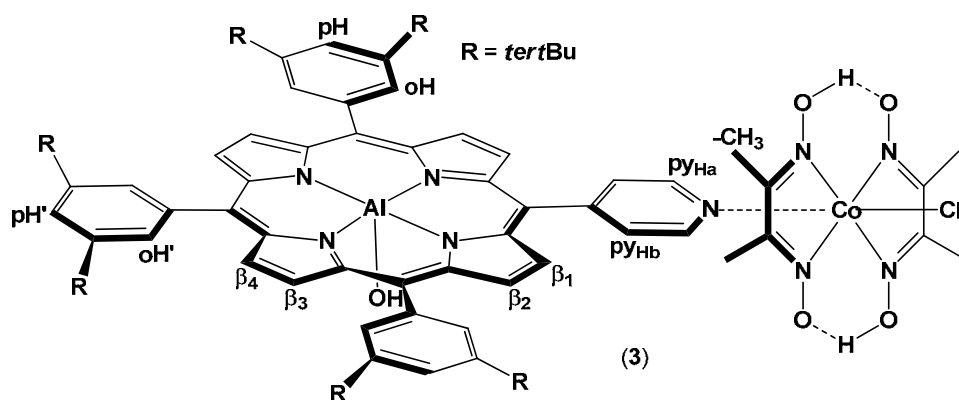

### Molecular models 4-6

5,10,15,20-tetraphenylporphyrin (4), [5,10,15,20-tetraphenylporphyrinato] zinc(II) (5), and 5,10,15,20-(3,5-di-*tert*-butyl)-tetraphenylporphyrinato-hydroxo} aluminum(III) (6) were prepared with the same experimental procedures reported before for the monopyridyl porphyrin analogues (vide supra).

**Chloro(4-ethylpyridine)bis(dimethylglyoximate) cobalt(III).** Co(dmgh)<sub>2</sub>Cl(EtPy) was synthesized according to literature procedures.<sup>[S10]</sup>



## X-ray molecular structure of dyad 1 and crystallographic data

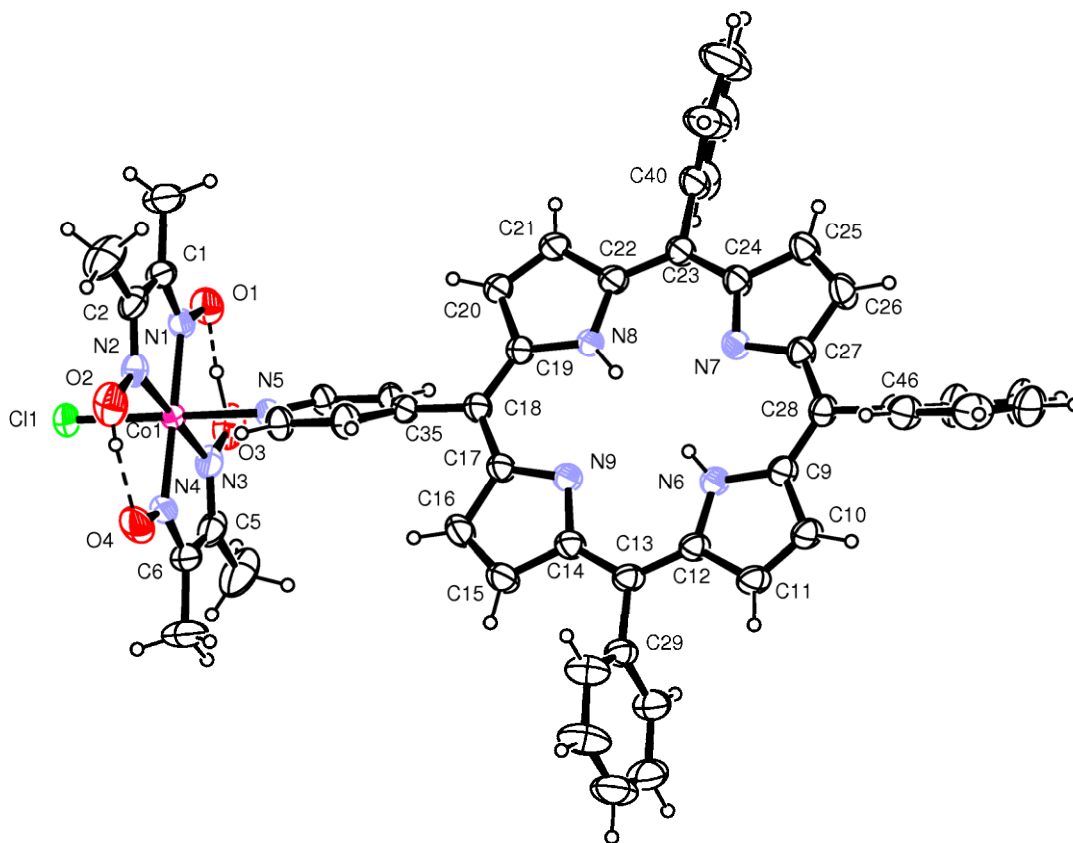

**Figure S1.** ORTEP<sup>[S11]</sup> diagram of dyad 1. Thermal ellipsoids are drawn at the 30% probability level.

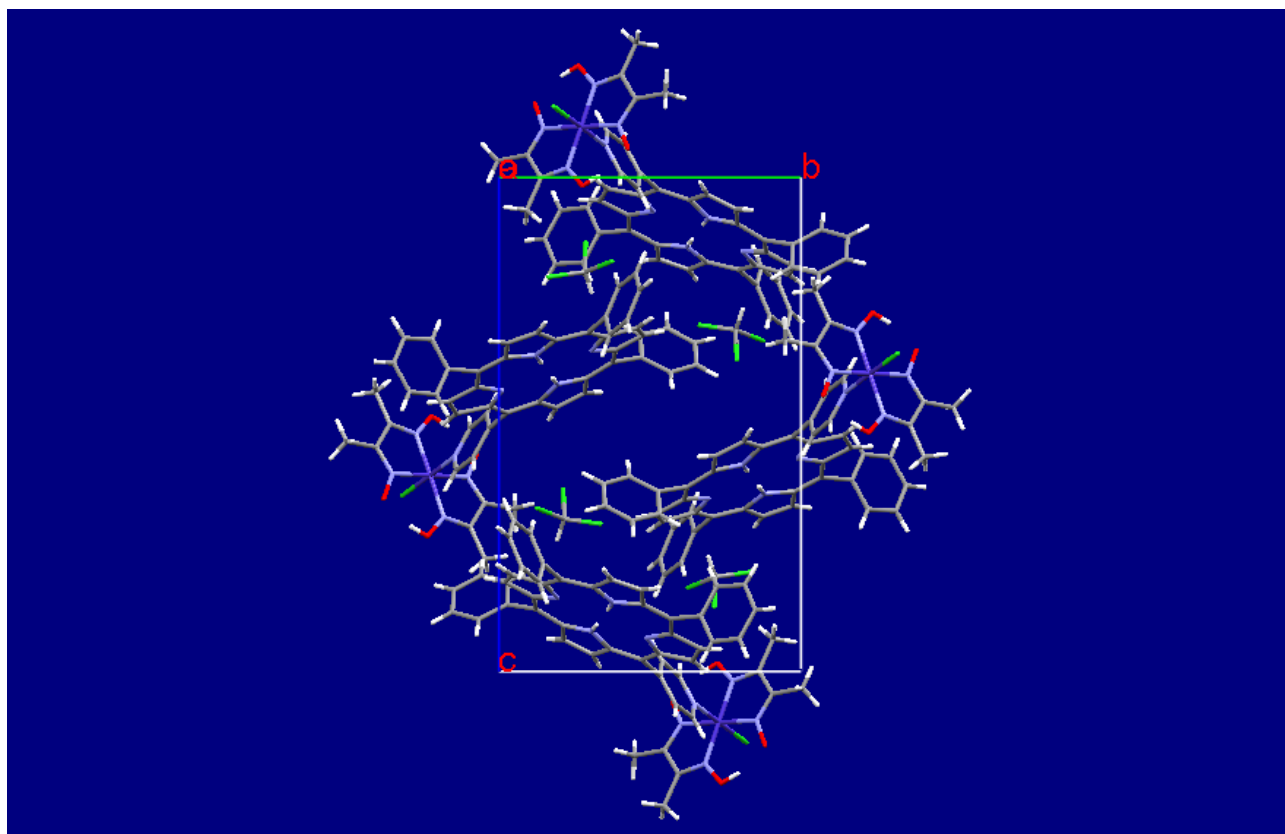

**Figure S2.** Crystal packing of dyad 1.

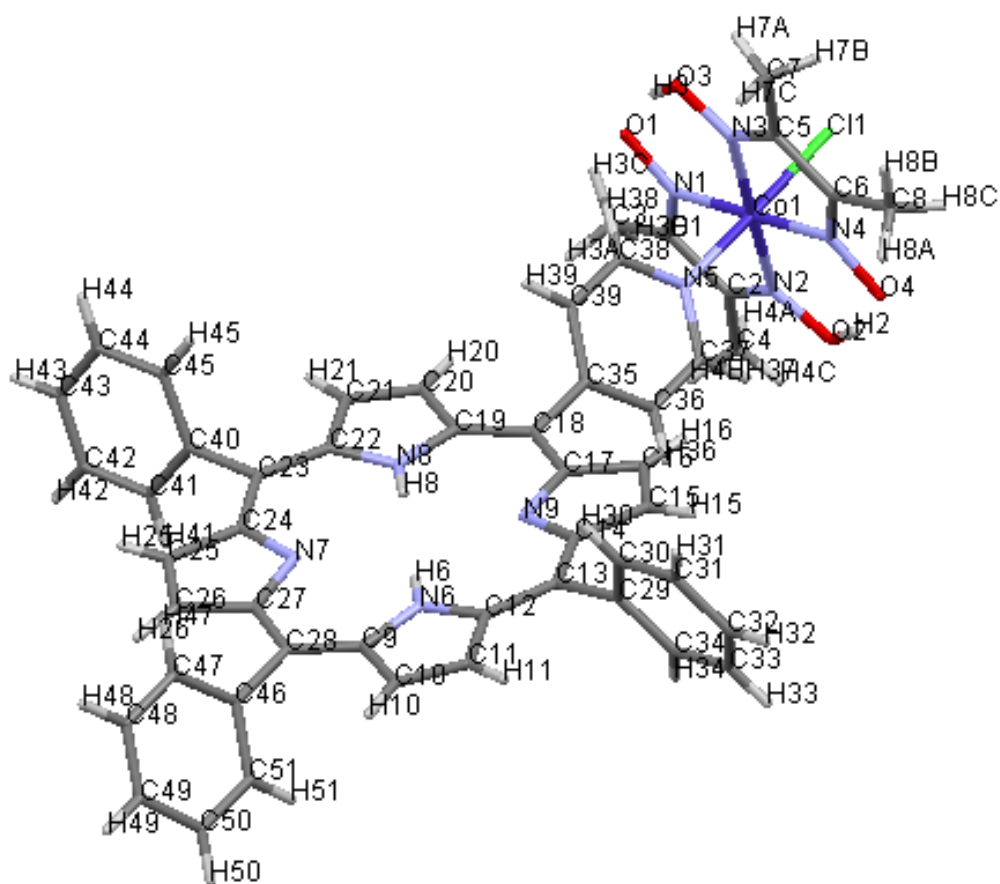

**Figure S3.** Atom labeling on the molecular structure of dyad 1.

**Table 1.** Crystal data and structure refinement for **1**.

|                                   |                                                |                            |
|-----------------------------------|------------------------------------------------|----------------------------|
| Empirical formula                 | $C_{51}H_{43}ClCoN_9O_4 \cdot CHCl_3$          |                            |
| Formula weight                    | 1059.69                                        |                            |
| Temperature                       | 295 K                                          |                            |
| Wavelength                        | 0.71073 Å                                      |                            |
| Crystal system                    | Monoclinic                                     |                            |
| Space group                       | $P2_1/c$                                       |                            |
| Unit cell dimensions              | $a = 20.2161(3)$ Å                             | $\alpha = 90^\circ$        |
|                                   | $b = 12.5775(2)$ Å                             | $\beta = 99.3737(6)^\circ$ |
|                                   | $c = 20.8200(4)$ Å                             | $\gamma = 90^\circ$        |
| Volume                            | $5223.2(2)$ Å <sup>3</sup>                     |                            |
| Z                                 | 4                                              |                            |
| Crystal size                      | 0.17 x 0.29 x 0.36 mm <sup>3</sup>             |                            |
| Theta range for data collection   | 3.58 to 26.00°                                 |                            |
| Index ranges                      | -24 ≤ h ≤ 24,<br>-14 ≤ k ≤ 15,<br>-25 ≤ l ≤ 25 |                            |
| Reflections collected             | 19016                                          |                            |
| Independent reflections           | 10202 [R(int) = 0.0231]                        |                            |
| Completeness to theta = 26.00°    | 99.3 %                                         |                            |
| Absorption correction             | Semi-empirical from equivalents                |                            |
| Max. and min. transmission        | 0.895 and 0.807                                |                            |
| Refinement method                 | Full-matrix least-squares on F <sup>2</sup>    |                            |
| Data / restraints / parameters    | 10202 / 15 / 658                               |                            |
| Goodness-of-fit on F <sup>2</sup> | 1.104                                          |                            |
| Final R indices [I > 2σ(I)]       | R1 = 0.0631, wR2 = 0.1899                      |                            |
| R indices (all data)              | R1 = 0.0825, wR2 = 0.2067                      |                            |
| Largest diff. peak and hole       | 0.620 and -0.612 e.Å <sup>-3</sup>             |                            |
| CCDC Deposition No.               | 944790                                         |                            |

**Table 2.** Bond distances and angles ( $\text{\AA}$ ,  $^\circ$ ) in **1**, see Figure S3 for atom labels

|         |            |         |            |
|---------|------------|---------|------------|
| Co1—N1  | 1.883 (2)  | C20—C21 | 1.355 (5)  |
| Co1—N4  | 1.886 (3)  | C20—H20 | 0.9300     |
| Co1—N3  | 1.889 (3)  | C21—C22 | 1.430 (4)  |
| Co1—N2  | 1.893 (3)  | C21—H21 | 0.9300     |
| Co1—N5  | 1.976 (2)  | C22—C23 | 1.392 (4)  |
| Co1—Cl1 | 2.2422 (8) | C23—C24 | 1.416 (4)  |
| N1—C1   | 1.291 (4)  | C23—C40 | 1.499 (5)  |
| N1—O1   | 1.332 (3)  | C24—C25 | 1.429 (4)  |
| N2—C2   | 1.296 (4)  | C25—C26 | 1.326 (5)  |
| N2—O2   | 1.350 (3)  | C25—H25 | 0.9300     |
| O2—H2   | 0.8200     | C26—C27 | 1.450 (5)  |
| C1—C2   | 1.457 (5)  | C26—H26 | 0.9300     |
| C1—C3   | 1.487 (5)  | C27—C28 | 1.389 (4)  |
| C2—C4   | 1.488 (5)  | C28—C46 | 1.490 (4)  |
| C3—H3A  | 0.9600     | C29—C34 | 1.366 (6)  |
| C3—H3B  | 0.9600     | C29—C30 | 1.394 (5)  |
| C3—H3C  | 0.9600     | C30—C31 | 1.423 (7)  |
| C4—H4A  | 0.9600     | C30—H30 | 0.9300     |
| C4—H4B  | 0.9600     | C31—C32 | 1.319 (8)  |
| C4—H4C  | 0.9600     | C31—H31 | 0.9300     |
| N3—C5   | 1.300 (5)  | C32—C33 | 1.359 (8)  |
| N3—O3   | 1.329 (4)  | C32—H32 | 0.9300     |
| O3—H3   | 0.8200     | C33—C34 | 1.366 (6)  |
| N4—C6   | 1.296 (5)  | C33—H33 | 0.9300     |
| N4—O4   | 1.350 (4)  | C34—H34 | 0.9300     |
| C5—C6   | 1.444 (7)  | C35—C39 | 1.387 (4)  |
| C5—C7   | 1.490 (6)  | C35—C36 | 1.393 (4)  |
| C6—C8   | 1.514 (6)  | C36—C37 | 1.378 (4)  |
| C7—H7A  | 0.9600     | C36—H36 | 0.9300     |
| C7—H7B  | 0.9600     | C37—H37 | 0.9300     |
| C7—H7C  | 0.9600     | C38—C39 | 1.369 (4)  |
| C8—H8A  | 0.9600     | C38—H38 | 0.9300     |
| C8—H8B  | 0.9600     | C39—H39 | 0.9300     |
| C8—H8C  | 0.9600     | C40—C41 | 1.360 (7)  |
| N5—C37  | 1.332 (4)  | C40—C45 | 1.399 (7)  |
| N5—C38  | 1.340 (4)  | C41—C42 | 1.390 (8)  |
| N6—C9   | 1.365 (4)  | C41—H41 | 0.9300     |
| N6—C12  | 1.368 (4)  | C42—C43 | 1.350 (11) |
| N6—H6   | 0.8600     | C42—H42 | 0.9300     |
| N7—C24  | 1.374 (4)  | C43—C44 | 1.307 (11) |
| N7—C27  | 1.387 (4)  | C43—H43 | 0.9300     |
| N8—C19  | 1.368 (4)  | C44—C45 | 1.399 (7)  |
| N8—C22  | 1.378 (4)  | C44—H44 | 0.9300     |
| N8—H8   | 0.8600     | C45—H45 | 0.9300     |
| N9—C17  | 1.372 (4)  | C46—C47 | 1.383 (5)  |
| N9—C14  | 1.380 (4)  | C46—C51 | 1.392 (5)  |

|            |             |             |            |
|------------|-------------|-------------|------------|
| C9—C28     | 1.406 (5)   | C47—C48     | 1.370 (6)  |
| C9—C10     | 1.430 (4)   | C47—H47     | 0.9300     |
| C10—C11    | 1.340 (5)   | C48—C49     | 1.336 (7)  |
| C10—H10    | 0.9300      | C48—H48     | 0.9300     |
| C11—C12    | 1.424 (4)   | C49—C50     | 1.374 (7)  |
| C11—H11    | 0.9300      | C49—H49     | 0.9300     |
| C12—C13    | 1.405 (4)   | C50—C51     | 1.412 (6)  |
| C13—C14    | 1.395 (4)   | C50—H50     | 0.9300     |
| C13—C29    | 1.503 (4)   | C51—H51     | 0.9300     |
| C14—C15    | 1.427 (5)   | C1A—C11B    | 1.606 (9)  |
| C15—C16    | 1.351 (5)   | C1A—C12A    | 1.625 (6)  |
| C15—H15    | 0.9300      | C1A—C13B    | 1.662 (13) |
| C16—C17    | 1.448 (4)   | C1A—C12B    | 1.681 (13) |
| C16—H16    | 0.9300      | C1A—C13A    | 1.697 (7)  |
| C17—C18    | 1.403 (4)   | C1A—C11A    | 1.720 (7)  |
| C18—C19    | 1.412 (4)   | C1A—H1A     | 0.9800     |
| C18—C35    | 1.487 (4)   | C12B—C13B   | 2.47 (3)   |
| C19—C20    | 1.432 (4)   |             |            |
|            |             |             |            |
| N1—Co1—N4  | 179.30 (11) | C22—C21—H21 | 125.8      |
| N1—Co1—N3  | 98.08 (12)  | N8—C22—C23  | 127.1 (3)  |
| N4—Co1—N3  | 82.31 (14)  | N8—C22—C21  | 107.1 (3)  |
| N1—Co1—N2  | 81.32 (11)  | C23—C22—C21 | 125.7 (3)  |
| N4—Co1—N2  | 98.28 (13)  | C22—C23—C24 | 126.0 (3)  |
| N3—Co1—N2  | 178.35 (11) | C22—C23—C40 | 118.1 (3)  |
| N1—Co1—N5  | 90.92 (10)  | C24—C23—C40 | 116.0 (3)  |
| N4—Co1—N5  | 89.66 (10)  | N7—C24—C23  | 124.8 (3)  |
| N3—Co1—N5  | 90.77 (10)  | N7—C24—C25  | 110.0 (3)  |
| N2—Co1—N5  | 90.78 (10)  | C23—C24—C25 | 125.2 (3)  |
| N1—Co1—C11 | 88.48 (7)   | C26—C25—C24 | 107.9 (3)  |
| N4—Co1—C11 | 90.95 (8)   | C26—C25—H25 | 126.1      |
| N3—Co1—C11 | 88.19 (8)   | C24—C25—H25 | 126.1      |
| N2—Co1—C11 | 90.25 (8)   | C25—C26—C27 | 107.5 (3)  |
| N5—Co1—C11 | 178.71 (7)  | C25—C26—H26 | 126.2      |
| C1—N1—O1   | 119.9 (3)   | C27—C26—H26 | 126.2      |
| C1—N1—Co1  | 117.0 (2)   | N7—C27—C28  | 125.5 (3)  |
| O1—N1—Co1  | 123.1 (2)   | N7—C27—C26  | 108.8 (3)  |
| C2—N2—O2   | 121.1 (3)   | C28—C27—C26 | 125.7 (3)  |
| C2—N2—Co1  | 116.0 (2)   | C27—C28—C9  | 125.0 (3)  |
| O2—N2—Co1  | 123.0 (2)   | C27—C28—C46 | 118.7 (3)  |
| N2—O2—H2   | 109.5       | C9—C28—C46  | 116.3 (3)  |
| N1—C1—C2   | 112.4 (3)   | C34—C29—C30 | 119.0 (3)  |
| N1—C1—C3   | 123.7 (4)   | C34—C29—C13 | 121.4 (3)  |
| C2—C1—C3   | 123.9 (3)   | C30—C29—C13 | 119.6 (4)  |
| N2—C2—C1   | 113.2 (3)   | C29—C30—C31 | 117.8 (5)  |
| N2—C2—C4   | 123.9 (4)   | C29—C30—H30 | 121.1      |
| C1—C2—C4   | 122.8 (4)   | C31—C30—H30 | 121.1      |
| C1—C3—H3A  | 109.5       | C32—C31—C30 | 121.2 (5)  |

|            |             |             |           |
|------------|-------------|-------------|-----------|
| C1—C3—H3B  | 109.5       | C32—C31—H31 | 119.4     |
| H3A—C3—H3B | 109.5       | C30—C31—H31 | 119.4     |
| C1—C3—H3C  | 109.5       | C31—C32—C33 | 120.6 (4) |
| H3A—C3—H3C | 109.5       | C31—C32—H32 | 119.7     |
| H3B—C3—H3C | 109.5       | C33—C32—H32 | 119.7     |
| C2—C4—H4A  | 109.5       | C32—C33—C34 | 120.3 (5) |
| C2—C4—H4B  | 109.5       | C32—C33—H33 | 119.8     |
| H4A—C4—H4B | 109.5       | C34—C33—H33 | 119.8     |
| C2—C4—H4C  | 109.5       | C29—C34—C33 | 121.1 (4) |
| H4A—C4—H4C | 109.5       | C29—C34—H34 | 119.4     |
| H4B—C4—H4C | 109.5       | C33—C34—H34 | 119.4     |
| C5—N3—O3   | 121.7 (3)   | C39—C35—C36 | 115.2 (3) |
| C5—N3—Co1  | 115.2 (3)   | C39—C35—C18 | 121.5 (3) |
| O3—N3—Co1  | 123.1 (2)   | C36—C35—C18 | 123.3 (3) |
| N3—O3—H3   | 109.5       | C37—C36—C35 | 120.7 (3) |
| C6—N4—O4   | 123.3 (3)   | C37—C36—H36 | 119.6     |
| C6—N4—Co1  | 115.2 (3)   | C35—C36—H36 | 119.6     |
| O4—N4—Co1  | 121.5 (2)   | N5—C37—C36  | 122.7 (3) |
| N3—C5—C6   | 113.4 (3)   | N5—C37—H37  | 118.6     |
| N3—C5—C7   | 121.9 (6)   | C36—C37—H37 | 118.6     |
| C6—C5—C7   | 124.7 (5)   | N5—C38—C39  | 122.4 (3) |
| N4—C6—C5   | 113.8 (3)   | N5—C38—H38  | 118.8     |
| N4—C6—C8   | 122.1 (6)   | C39—C38—H38 | 118.8     |
| C5—C6—C8   | 124.0 (5)   | C38—C39—C35 | 121.5 (3) |
| C5—C7—H7A  | 109.5       | C38—C39—H39 | 119.3     |
| C5—C7—H7B  | 109.5       | C35—C39—H39 | 119.3     |
| H7A—C7—H7B | 109.5       | C41—C40—C45 | 116.9 (4) |
| C5—C7—H7C  | 109.5       | C41—C40—C23 | 123.5 (4) |
| H7A—C7—H7C | 109.5       | C45—C40—C23 | 119.4 (4) |
| H7B—C7—H7C | 109.5       | C40—C41—C42 | 120.1 (6) |
| C6—C8—H8A  | 109.5       | C40—C41—H41 | 120.0     |
| C6—C8—H8B  | 109.5       | C42—C41—H41 | 120.0     |
| H8A—C8—H8B | 109.5       | C43—C42—C41 | 121.6 (7) |
| C6—C8—H8C  | 109.5       | C43—C42—H42 | 119.2     |
| H8A—C8—H8C | 109.5       | C41—C42—H42 | 119.2     |
| H8B—C8—H8C | 109.5       | C44—C43—C42 | 120.2 (6) |
| C37—N5—C38 | 117.5 (2)   | C44—C43—H43 | 119.9     |
| C37—N5—Co1 | 122.63 (19) | C42—C43—H43 | 119.9     |
| C38—N5—Co1 | 119.84 (19) | C43—C44—C45 | 120.2 (7) |
| C9—N6—C12  | 108.5 (2)   | C43—C44—H44 | 119.9     |
| C9—N6—H6   | 125.7       | C45—C44—H44 | 119.9     |
| C12—N6—H6  | 125.7       | C40—C45—C44 | 121.0 (6) |
| C24—N7—C27 | 105.8 (2)   | C40—C45—H45 | 119.5     |
| C19—N8—C22 | 109.2 (2)   | C44—C45—H45 | 119.5     |
| C19—N8—H8  | 125.4       | C47—C46—C51 | 117.7 (3) |
| C22—N8—H8  | 125.4       | C47—C46—C28 | 122.1 (3) |
| C17—N9—C14 | 106.6 (2)   | C51—C46—C28 | 120.1 (3) |
| N6—C9—C28  | 126.1 (3)   | C48—C47—C46 | 121.5 (4) |

|             |           |               |            |
|-------------|-----------|---------------|------------|
| N6—C9—C10   | 107.7 (3) | C48—C47—H47   | 119.2      |
| C28—C9—C10  | 126.2 (3) | C46—C47—H47   | 119.2      |
| C11—C10—C9  | 107.9 (3) | C49—C48—C47   | 120.7 (5)  |
| C11—C10—H10 | 126.1     | C49—C48—H48   | 119.7      |
| C9—C10—H10  | 126.1     | C47—C48—H48   | 119.7      |
| C10—C11—C12 | 108.0 (3) | C48—C49—C50   | 120.9 (4)  |
| C10—C11—H11 | 126.0     | C48—C49—H49   | 119.5      |
| C12—C11—H11 | 126.0     | C50—C49—H49   | 119.5      |
| N6—C12—C13  | 126.5 (3) | C49—C50—C51   | 119.0 (4)  |
| N6—C12—C11  | 107.9 (3) | C49—C50—H50   | 120.5      |
| C13—C12—C11 | 125.6 (3) | C51—C50—H50   | 120.5      |
| C14—C13—C12 | 125.9 (3) | C46—C51—C50   | 120.0 (4)  |
| C14—C13—C29 | 118.0 (3) | C46—C51—H51   | 120.0      |
| C12—C13—C29 | 116.1 (3) | C50—C51—H51   | 120.0      |
| N9—C14—C13  | 126.1 (3) | C11B—C1A—C12A | 150.6 (6)  |
| N9—C14—C15  | 109.5 (3) | C11B—C1A—C13B | 104.8 (16) |
| C13—C14—C15 | 124.5 (3) | C12A—C1A—C13B | 62.6 (12)  |
| C16—C15—C14 | 107.8 (3) | C11B—C1A—C12B | 111.7 (11) |
| C16—C15—H15 | 126.1     | C12A—C1A—C12B | 48.6 (8)   |
| C14—C15—H15 | 126.1     | C13B—C1A—C12B | 95.2 (12)  |
| C15—C16—C17 | 106.8 (3) | C11B—C1A—C13A | 60.0 (6)   |
| C15—C16—H16 | 126.6     | C12A—C1A—C13A | 113.2 (5)  |
| C17—C16—H16 | 126.6     | C13B—C1A—C13A | 50.6 (11)  |
| N9—C17—C18  | 125.3 (3) | C12B—C1A—C13A | 131.5 (11) |
| N9—C17—C16  | 109.3 (3) | C11B—C1A—C11A | 52.1 (6)   |
| C18—C17—C16 | 125.3 (3) | C12A—C1A—C11A | 111.6 (4)  |
| C17—C18—C19 | 125.2 (3) | C13B—C1A—C11A | 125.9 (15) |
| C17—C18—C35 | 117.3 (3) | C12B—C1A—C11A | 63.2 (9)   |
| C19—C18—C35 | 117.1 (3) | C13A—C1A—C11A | 106.1 (4)  |
| N8—C19—C18  | 125.9 (3) | C11B—C1A—H1A  | 100.3      |
| N8—C19—C20  | 107.8 (3) | C12A—C1A—H1A  | 108.6      |
| C18—C19—C20 | 126.3 (3) | C13B—C1A—H1A  | 124.6      |
| C21—C20—C19 | 107.6 (3) | C12B—C1A—H1A  | 119.8      |
| C21—C20—H20 | 126.2     | C13A—C1A—H1A  | 108.6      |
| C19—C20—H20 | 126.2     | C11A—C1A—H1A  | 108.6      |
| C20—C21—C22 | 108.3 (3) | C1A—C12B—C13B | 42.1 (6)   |
| C20—C21—H21 | 125.8     | C1A—C13B—C12B | 42.7 (7)   |



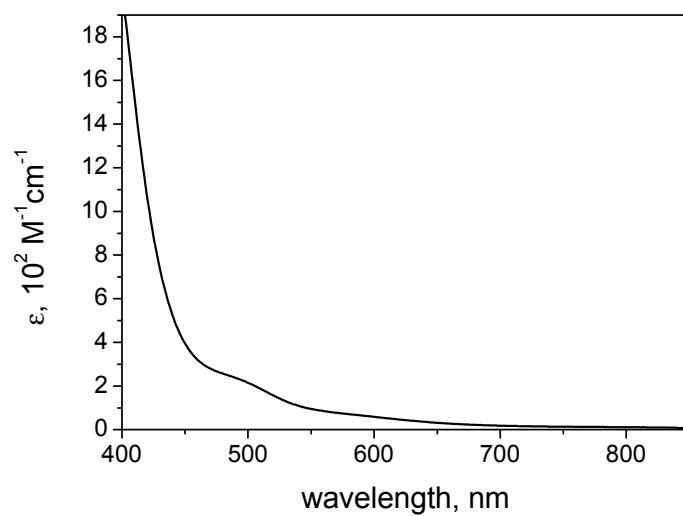

**Figure S4.** Absorption spectrum of model compound  $\text{Co}(\text{dmgH})_2\text{Cl}(\text{EtPy})$  in THF.

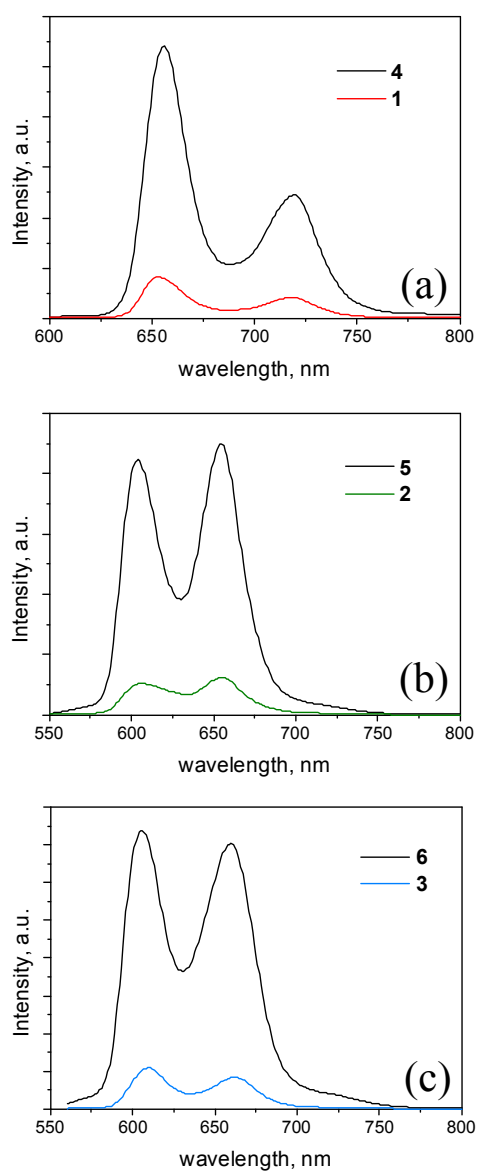

**Figure S5.** Comparison of emission spectra in THF (ca.  $1 \times 10^{-5}$  M) of optically matched solutions at the excitation wavelength of (a) **1** and **4** (excitation at 530 nm), (b) **2** and **5** (excitation at 530 nm), and (c) **3** and **6** (excitation at 550 nm).

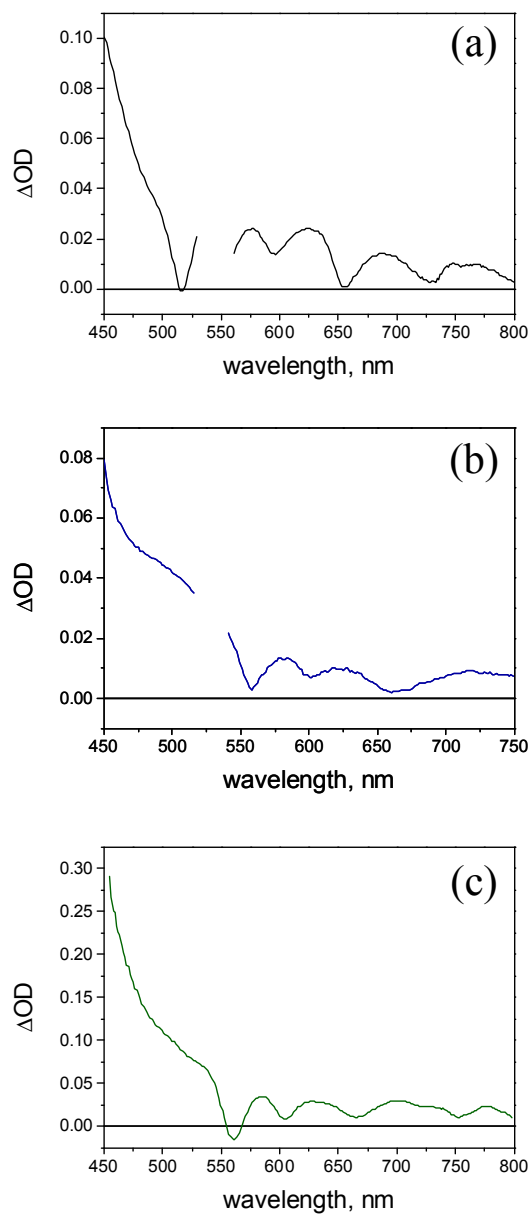

**Figure S6.** Excited singlet state difference absorption spectra obtained by Ultrafast Spectroscopy in THF on the molecular models (a) **4** (excitation at 550 nm), (b) **5** (excitation at 530 nm), and (c) **6** (excitation at 550 nm).

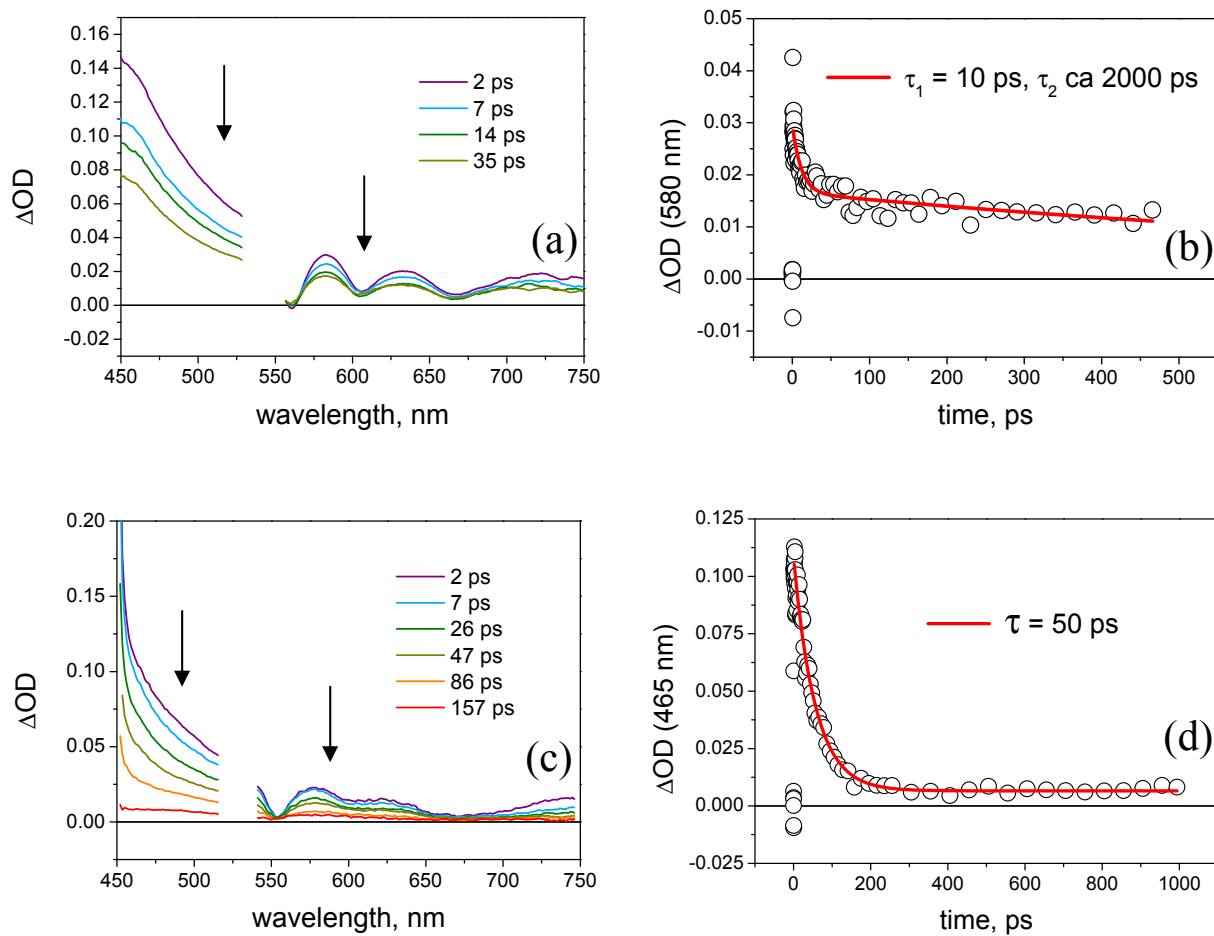

**Figure S7.** (a) Difference absorption spectra obtained by ultrafast spectroscopy in DMF for **2** (excitation at 550 nm), (b) kinetic analysis at 580 nm and relative fitting; (c) difference absorption spectra obtained by ultrafast spectroscopy in toluene for **2** (excitation at 530 nm), (d) kinetic analysis at 465 nm and relative fitting.

## References

- [S1] Z. Otwinowski and Z. Minor, In *Methods Enzymol*, C. W. Carter, R. M. Sweet, Eds. Academic Press: London, 1977; vol. **276**, Part A, p 307.
- [S2] R. H. Blessing, *Acta Crystallogr.*, 1995, **A51**, 33.
- [S3] A. Altomare, M. C. Burla, M. Camalli, G. L. Casciarano, C. Giacovazzo, A. Moliterni, A. G. G. Polidori and R. Spagna, *J. Appl. Crystallogr.*, 1999, **32**, 115.
- [S4] A.L. Spek, *Acta Crystallogr.*, 2009, **D65**, 148.
- [S5] G. M. Sheldrick, SHELXL97, Program for Crystal Structure Refinement; University of Göttingen: Göttingen, Germany, 1997.
- [S6] L. Farrugia, *J. Appl. Crystallogr.*, 1999, **32**, 837.
- [S7] C. Chiorboli, M. A. J. Rodger and F. Scandola, *J. Am. Chem. Soc.*, 2003, **125**, 483.
- [S8] E. B. Fleischer and A. M. Shacter, *Inorg. Chem.*, 1991, **30**, 3763.
- [S9] For more experimental details see: (a) G. J. E. Davidson, L. H. Tong, P. R. Raithby and J. K. M. Sanders, *Chem. Commun.*, 2006, 3087; (b) E. Iengo., D. G. Pantos, J. K. M. Sanders, M. Orlandi, C. Chiorboli, S. Fracasso and F. Scandola, *Chem. Sci.*, 2011, **2**, 676.
- [S10] G. N. Schrauzer, *Inorg. Synth.* **1968**, *11*, 61.
- [S11] M. N. Burnett and C.K, Johnson. *ORTEP-III: Oak Ridge Thermal Ellipsoids Plot Program for Crystal Structure Illustrations*, Oak Ridge National Laboratory Report ORNL-6895, TN, 1996.
